# Supplementary material for: Open-reading-frame sequence tags (OSTs) support the existence of at least 17,300 genes in C. elegans
Source: Springer Nature journal article supplement (doi:10.1038/85913), 2001-03-01
Supplement: 41588_2001_BFng0301_332_MOESM1_ESM.pdf [file 41588_2001_BFng0301_332_MOESM1_ESM.pdf]

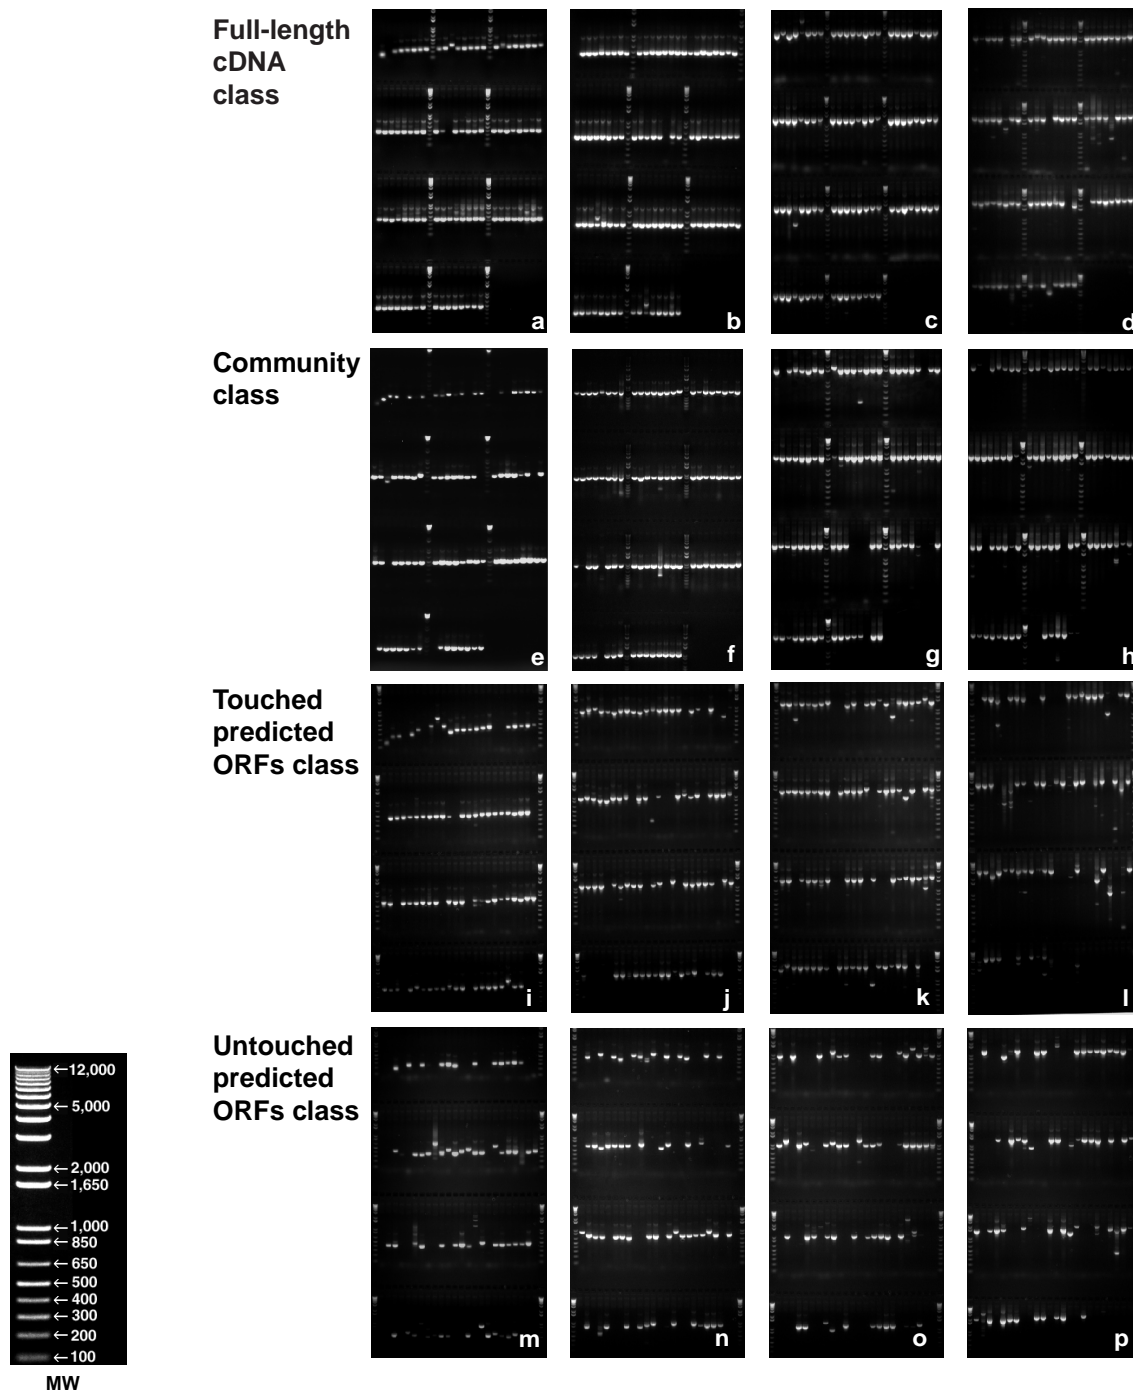

**Fig. A.** PCR amplification of *C. elegans* ORFs.

Representative samples of PCR products obtained using primers that anneal right downstream of the ATG and right upstream of the STOP as a way to amplify full-length protein-coding ORFs.

The sequence of the ORFs were completely confirmed (panels a-d and e-h), either by the large-scale EST project (panels a-d) or individually by the *C. elegans* community (panels e-h),

predicted by GeneFinder and confirmed by one or a few ESTs ("touched") (panels i-l),

or predicted by GeneFinder but completely unconfirmed ("untouched") (panels m-p).

See <http://worfdb.dfci.harvard.edu/supplement.html> for a complete set of data.
