# Supplementary material for: Open-reading-frame sequence tags (OSTs) support the existence of at least 17,300 genes in C. elegans
Source: Springer Nature journal article supplement (doi:10.1038/85913), 2001-03-01
Supplement: 41588_2001_BFng0301_332_MOESM2_ESM.pdf [file 41588_2001_BFng0301_332_MOESM2_ESM.pdf]

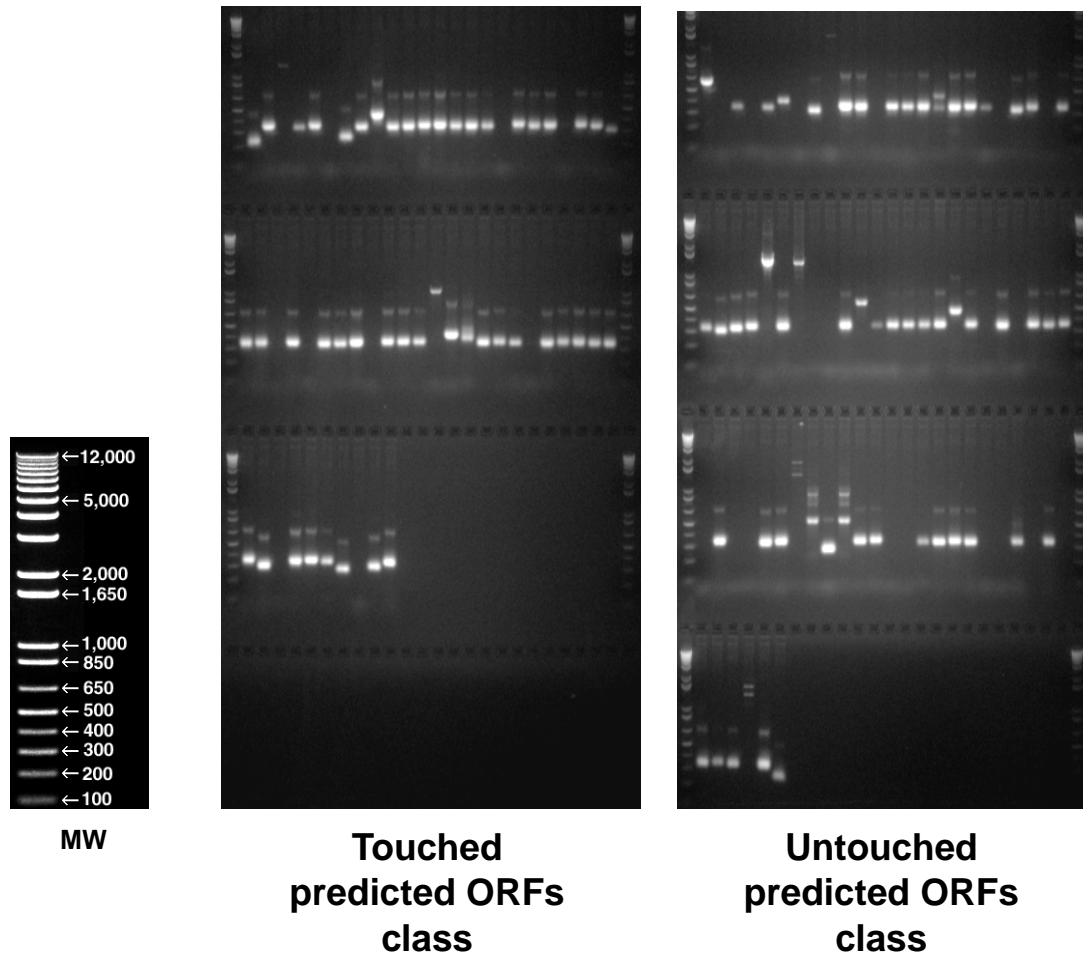

**Fig. B** PCR amplification of *C. elegans* ORFs using internal primers  
 PCR products obtained using internal primers for genes predicted and confirmed by one or a few ESTs (left panel), or predicted but completely unconfirmed genes (right panel). Internal primers were used to PCR amplify the cDNAs for which no product was obtained using primers designed to amplify the full length ORFs (see Fig. A).
